# Supplementary material
Source: HighWire-hosted journal article supplement (https://bmjmedicine.bmj.com/content/1/1/e000233)

## A) COS and EMA

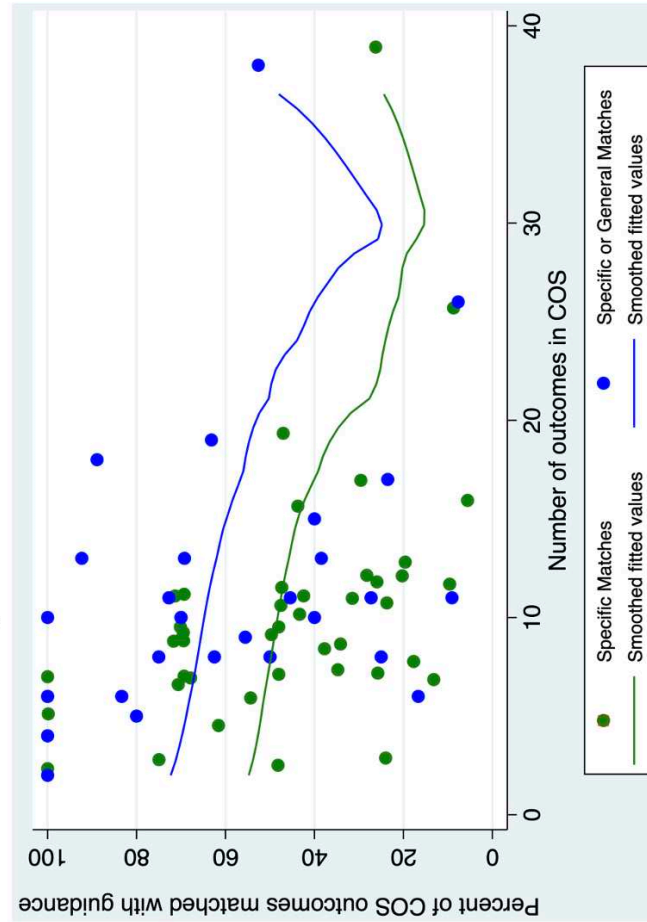

## B) COS and FDA

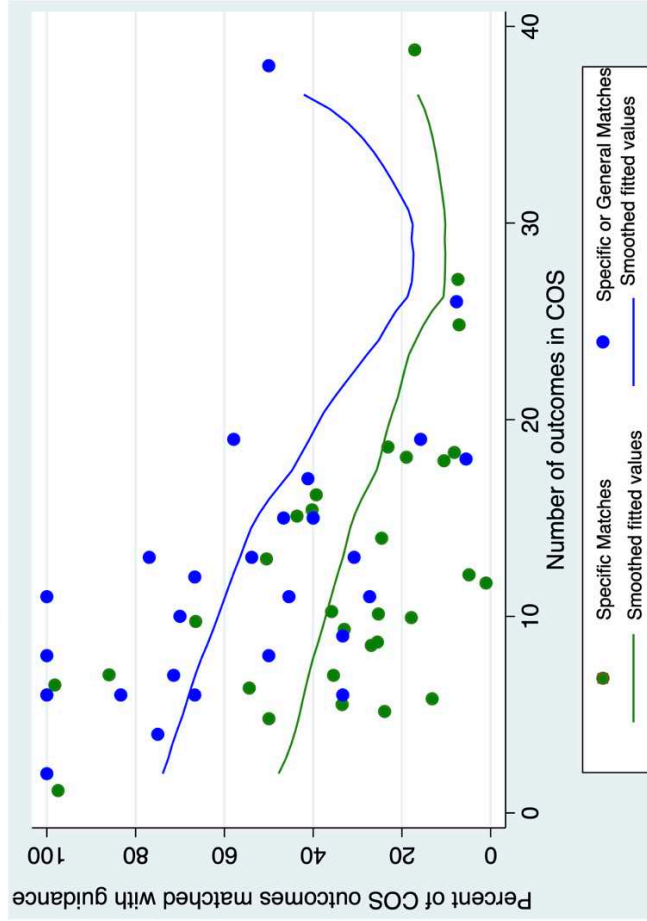

Supplement: inline-supplementary-material-1 [file inline-supplementary-material-1.pdf]
